# Supplementary material for: Benthic invertebrates in Svalbard fjords—when metabarcoding does not outperform traditional biodiversity assessment
Source: PeerJ journal article supplement (doi:10.7717/peerj.14321), 2022-11-17

Sediment sampling: 5 grabs per station

# TRADITIONAL METHOD

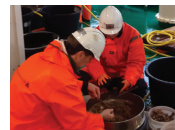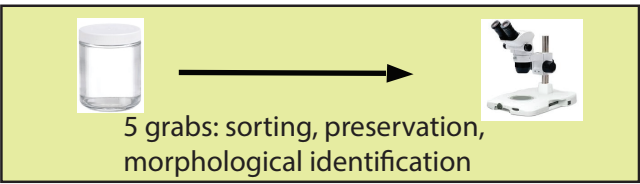

# METABARCODING

eDNA sampling: totally 9 from 5 grabs

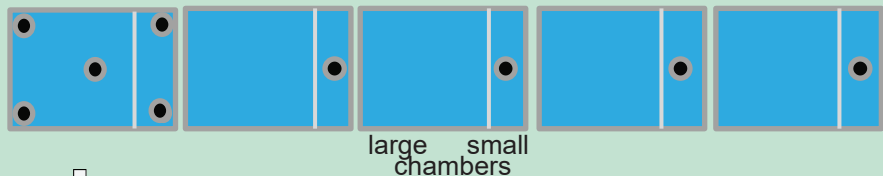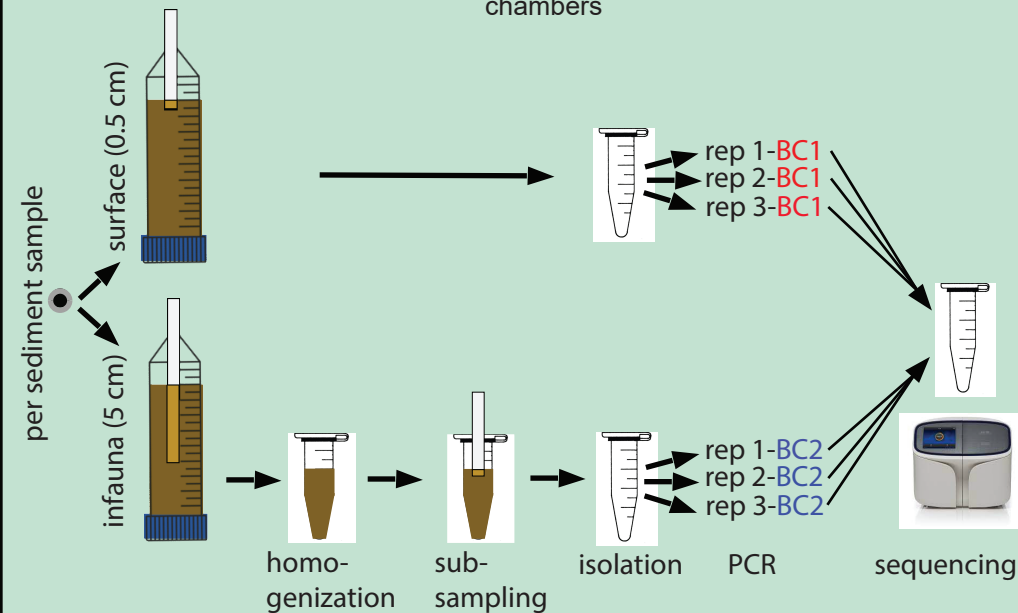

# BARCODING

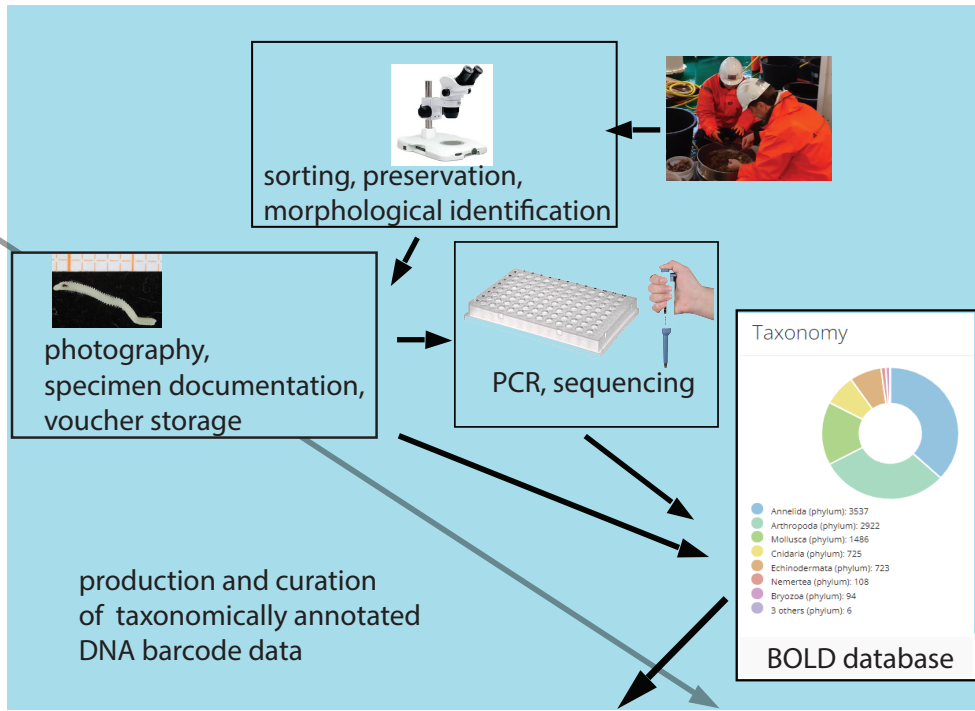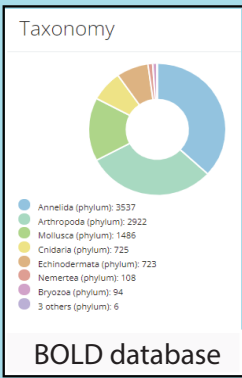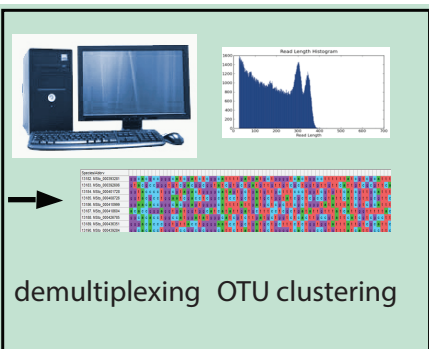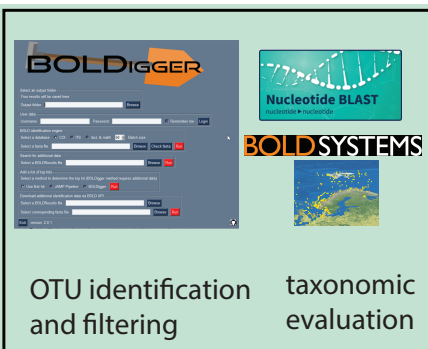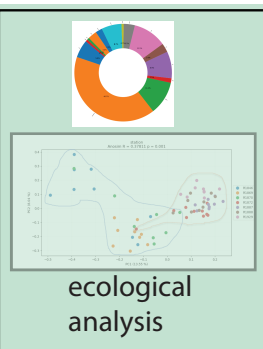

Supplement: Figure_S1.pdf [file Figure_S1.pdf]
