# Supplementary material for: Benthic invertebrates in Svalbard fjords—when metabarcoding does not outperform traditional biodiversity assessment
Source: PeerJ journal article supplement (doi:10.7717/peerj.14321), 2022-11-17

# infauna

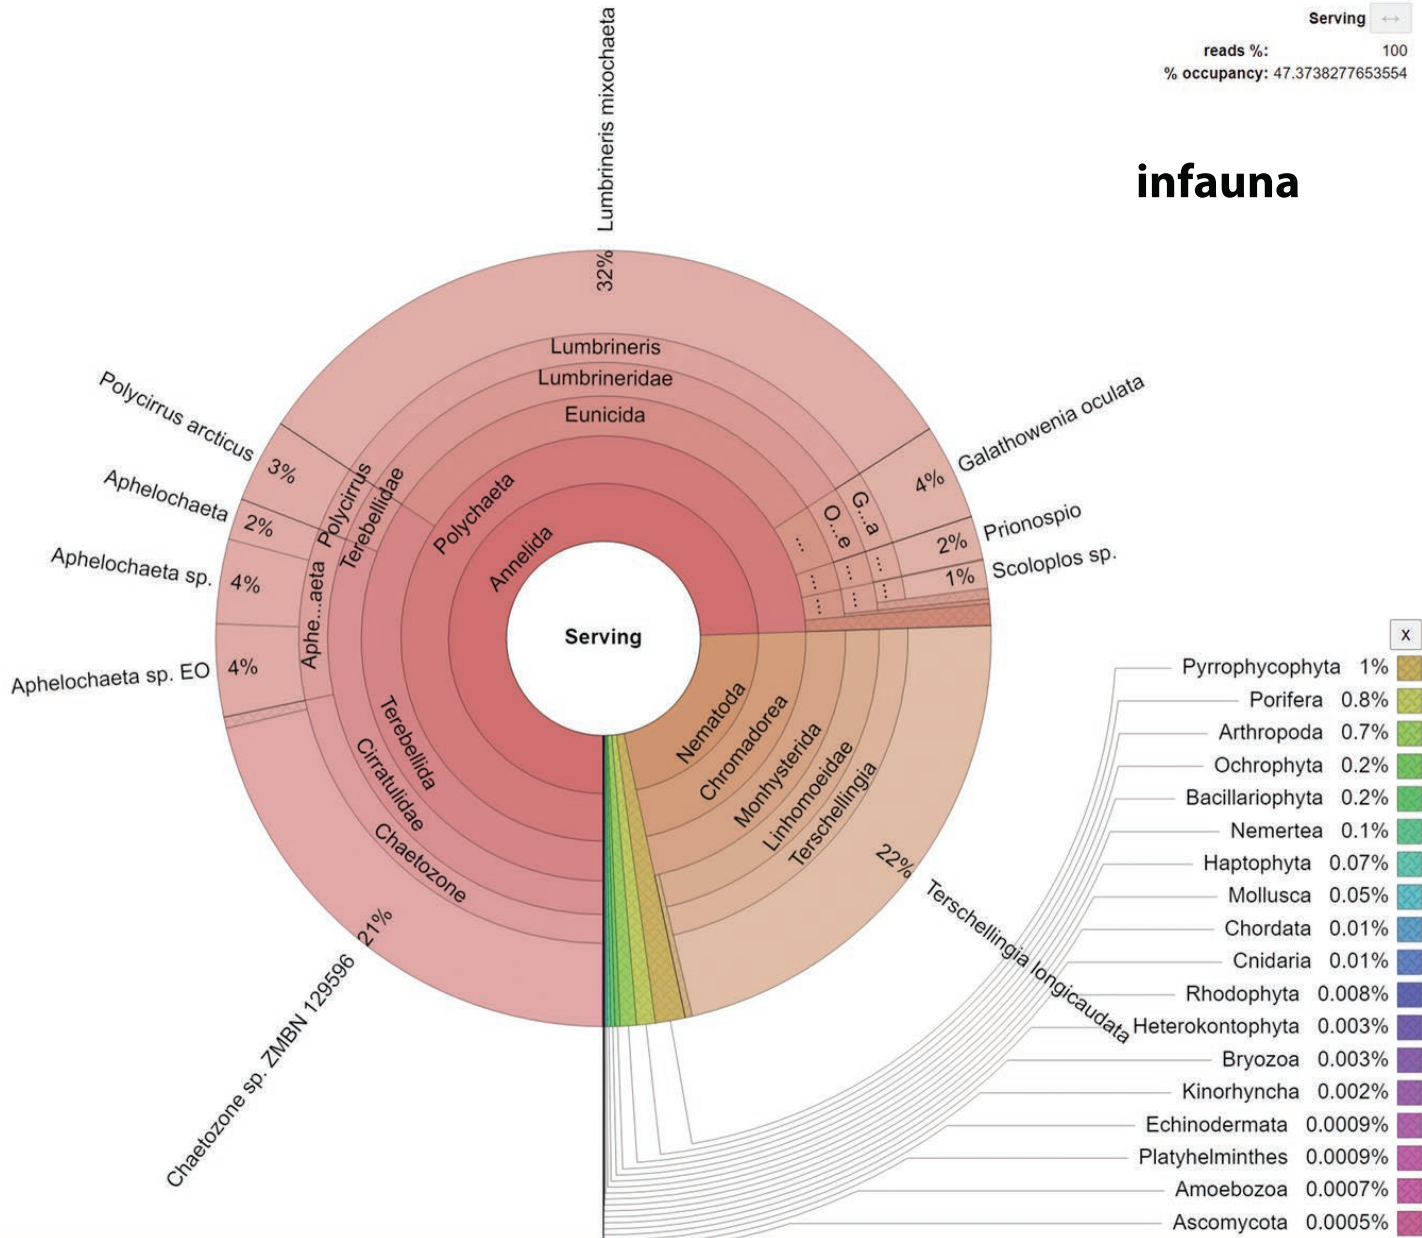

Supplement: Figure_S3.pdf [file Figure_S3.pdf]
