# Supplementary material for: Benthic invertebrates in Svalbard fjords—when metabarcoding does not outperform traditional biodiversity assessment
Source: PeerJ journal article supplement (doi:10.7717/peerj.14321), 2022-11-17

# Distribution of primer-sequence W-C mismatches in sequences from detected (n=33) and undetected (n=63) Polychaeta species

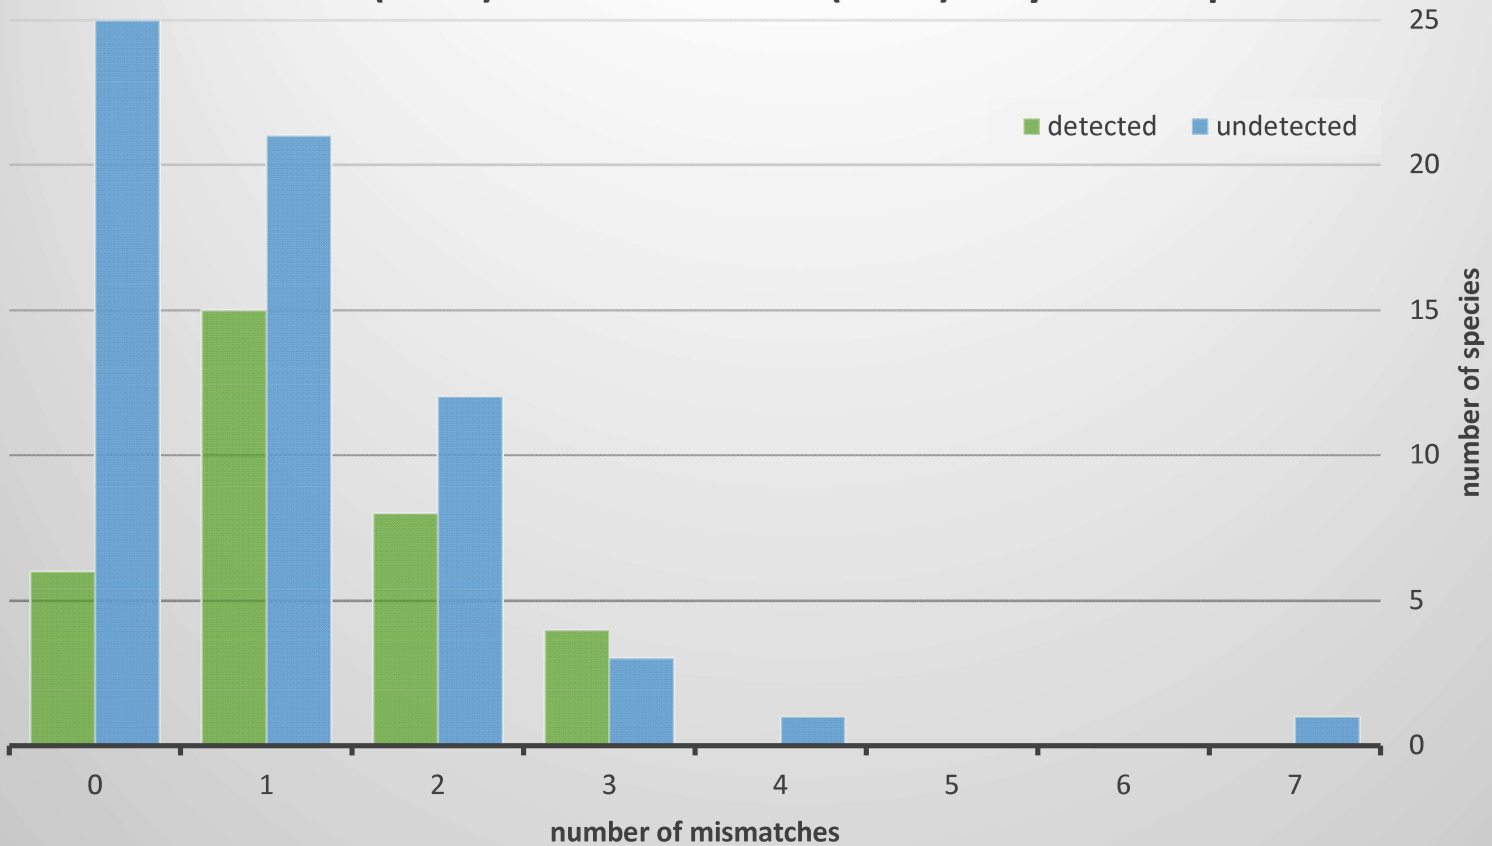

Supplement: Figure_S4.pdf [file Figure_S4.pdf]
