# Supplementary material for: Benthic invertebrates in Svalbard fjords—when metabarcoding does not outperform traditional biodiversity assessment
Source: PeerJ. 2022 Nov 17;10:e14321. doi: 10.7717/peerj.14321 (PMC9676020; doi:10.7717/peerj.14321)
Supplement: Supplemental Information 7 — Scores of environmental variables to axes PC1 and PC2 of PCo analysis of taxa occurrence data from eDNA and morphologically identified taxa. Also see Fig. 9. [file peerj-10-14321-s007.xlsx]

## Sheet: PCoA
Table S7. Scores of environmental variables to axes PC1 and PC2 of PCo analysis of taxa occurrence data from eDNA. morphologically (morpho) identified taxa. and pooled scoores from both analyses. Environmental variables are latitude (lat). longitude (long). depth. bottom temperature (temp). salinity (sal). total organic matter (TOM). total organic carbon (TOC). sediment grain size (grains). perce…
eDNA	variable	PC1	PC2	R2	p	significance
	lat	0.99733	0.07302	0.7031	0.001	***
	long	1.0000	0.00292	0.7628	0.001	***
	depth	-1.0000	0.00056	0.7429	0.001	***
	temp	-0.75195	0.65922	0.1996	0.035	*
	sal	-0.73789	0.67493	0.3306	0.005	**
	TOM	-0.99755	0.07001	0.486	0.001	***
	TOC	-0.94585	0.32461	0.4786	0.001	***
	grains	-0.71525	-0.69887	0.1868	0.033	*
	sand	0.60103	0.79923	0.2354	0.01	**
	gravel	0.98023	-0.19788	0.0477	0.472	n.s.
morpho	variable	PC1	PC2	R2	p	significance
	lat	0.50324	-0.86415	0.8942	0.001	***
	long	0.68054	-0.73271	0.9152	0.001	***
	depth	-0.69462	0.71938	0.7747	0.001	***
	temp	-0.91491	-0.40367	0.8434	0.001	***
	sal	-0.89509	-0.44588	0.8068	0.001	***
	TOM	-0.91758	0.39756	0.722	0.001	***
	TOC	-0.99945	0.03331	0.9038	0.001	***
	grains	-0.42231	0.90645	0.3106	0.004	**
	sand	0.13819	-0.99041	0.3647	0.002	**
	gravel	0.99518	0.09805	0.3996	0.001	***
pooled Pco scores	variable	PC1	PC2	R2	p	significance
	lat	0.84997	-0.52683	0.6188	0.001	***
	long	0.90903	-0.41673	0.7438	0.001	***
	depth	-0.91811	0.39632	0.6745	0.001	***
	temp	-0.99993	0.01192	0.4151	0.001	***
	sal	-0.99727	0.07388	0.4527	0.001	***
	TOM	-0.97076	0.24006	0.5987	0.001	***
	TOC	-0.98496	0.17277	0.6835	0.001	***
	grains	-0.93428	0.35655	0.1141	0.016	*
	sand	0.80305	-0.59592	0.0584	0.152	n.s.
	gravel	0.99998	0.00641	0.1956	0.001	***
