# Supplementary material for: Benthic invertebrates in Svalbard fjords—when metabarcoding does not outperform traditional biodiversity assessment
Source: PeerJ. 2022 Nov 17;10:e14321. doi: 10.7717/peerj.14321 (PMC9676020; doi:10.7717/peerj.14321)
Supplement: Supplemental Information 8 — Results from the PERMANOVA tests based Hellinger transformed Bray-Curtis dissimilarity matrix. [file peerj-10-14321-s008.xlsx]

## Sheet: Sheet1
PERMANOVA
Factor	df	SS	MS	Pseudo-F	R2	P-value
Between fjords
Fjord	1	2.499	2.4993	8.132	0.0483	0.001
Fraction*	1	9.949	9.9489	32.37	0.1923	0.001
Fjord:Fraction	1	2.414	2.4135	7.853	0.0466	0.001
Kongsfjorden
Among stations	1	0.293	0.29298	0.75984	0.01497	0.632
Infauna vs surface	1	6.0342	6.0342	22.286	0.21327	0.001
Rijpfjorden
Among stations	1	1.8427	1.84274	4.6351	0.0621	0.001
Infauna vs surface	1	6.3282	6.3282	18.976	0.21327	0.001
* Infauna vs. Surface
